# Supplementary material for: Selective Induction of Intrinsic Apoptosis in Retinoblastoma Cells by Novel Cationic Antimicrobial Dodecapeptides
Source: MDPI journal article supplement (doi:10.3390/pharmaceutics14112507), 2022-11-18
Supplement: s1 [file s1]

## Supplementary Materials:

# Selective Induction of Intrinsic Apoptosis in Retinoblastoma Cells by Novel Cationic Antimicrobial Dodecapeptides

Vishnu Suresh Babu, Atish Kizhakeyil, Gagan Dudeja, Shyam S. Chaurasia, Veluchami Amutha Barathi, Stephane Heymans, Navin Kumar Verma, Rajamani Lakshminarayanan and Arkasubhra Ghosh

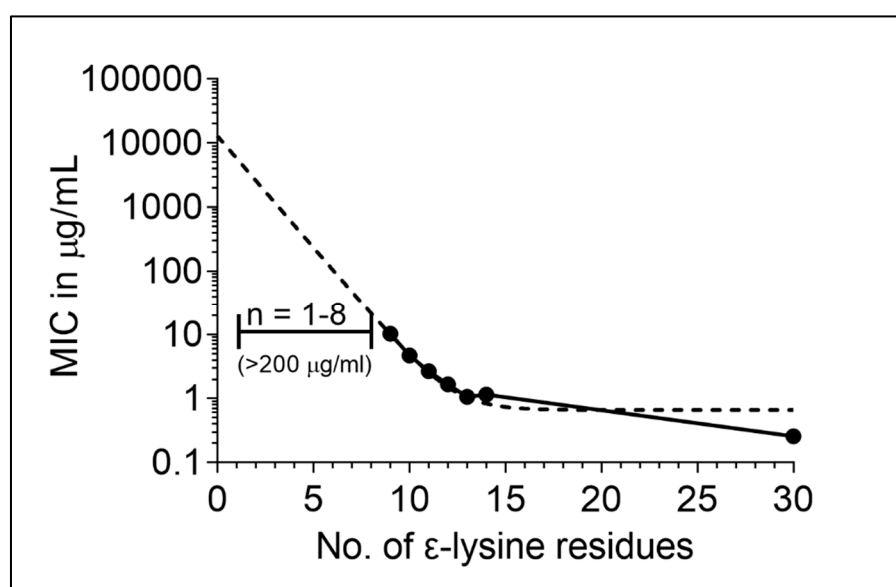

**Figure S1.** Correlation between MIC values and number of  $\epsilon$ -lysine residues. The dotted lines represent the non-linear fit and suggest the value is optimized at  $\geq 12$  residues.

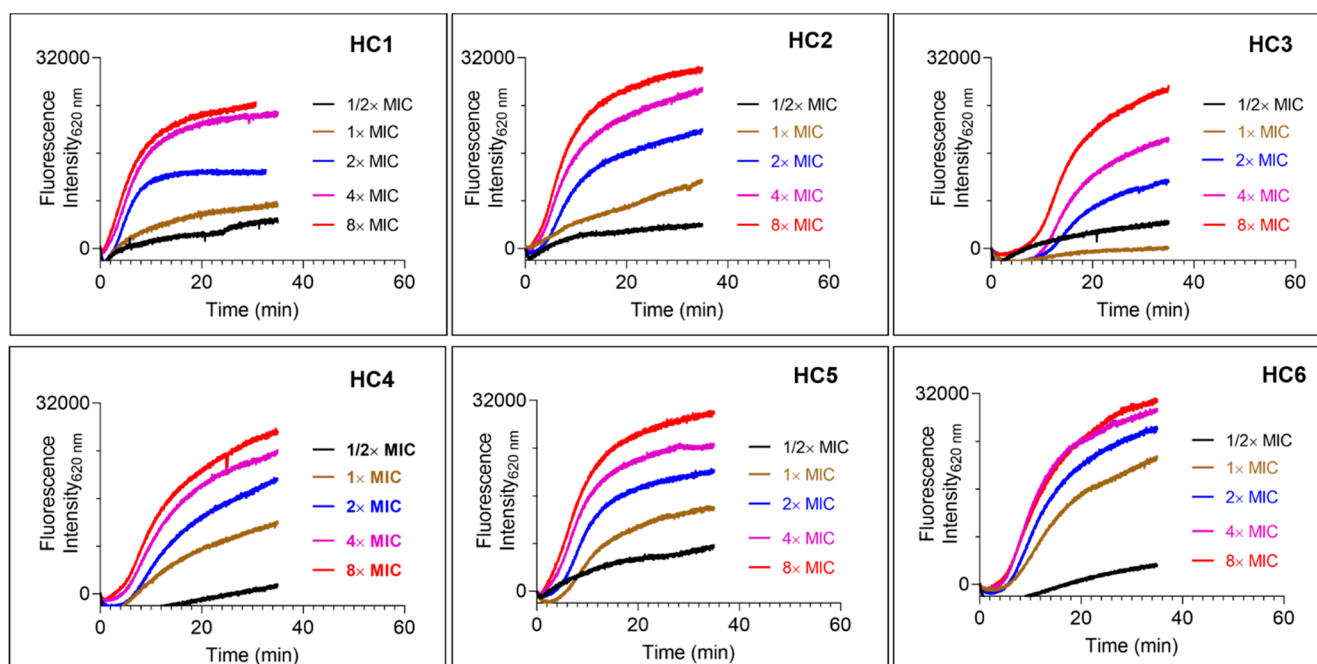

**Figure S2.** Interaction of peptides with the cytoplasmic membrane of *P. aeruginosa* ATCC 9027 strains probed by DiSC3-5 assay. Change in membrane potential of intact bacterial cells upon addition of peptides was inferred by the increase in fluorescence intensity of membrane-sensitive probe. The concentration of peptides was expressed in terms of MIC values.

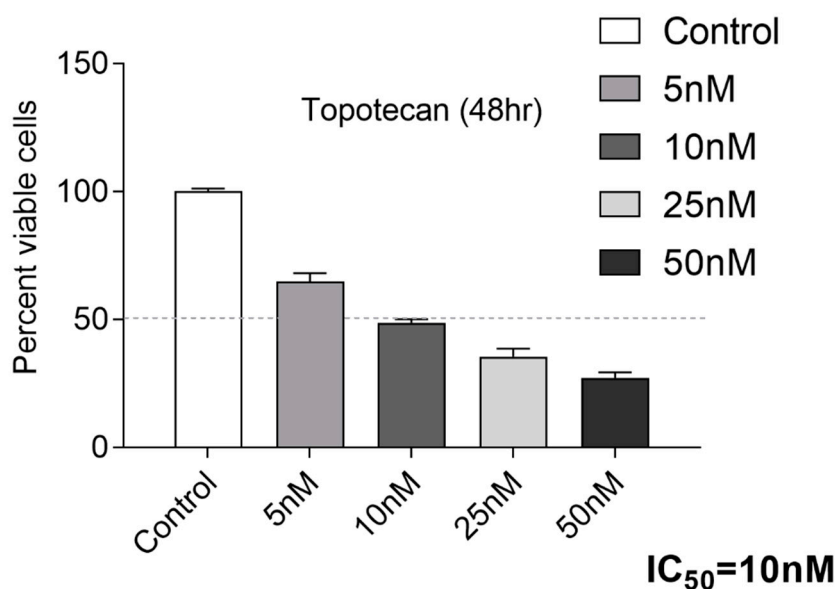

**Figure S3.** Determination of Topotecan IC<sub>50</sub> in WERI-Rb1 cells using MTS assay. The dotted horizontal lines represent 50% viability. The concentrations of topotecan varied from 5nM to 50nM for 48hour exposure in WERI-Rb1 cells. Topotecan IC<sub>50</sub> = 10nM for WERI-Rb1 cells.

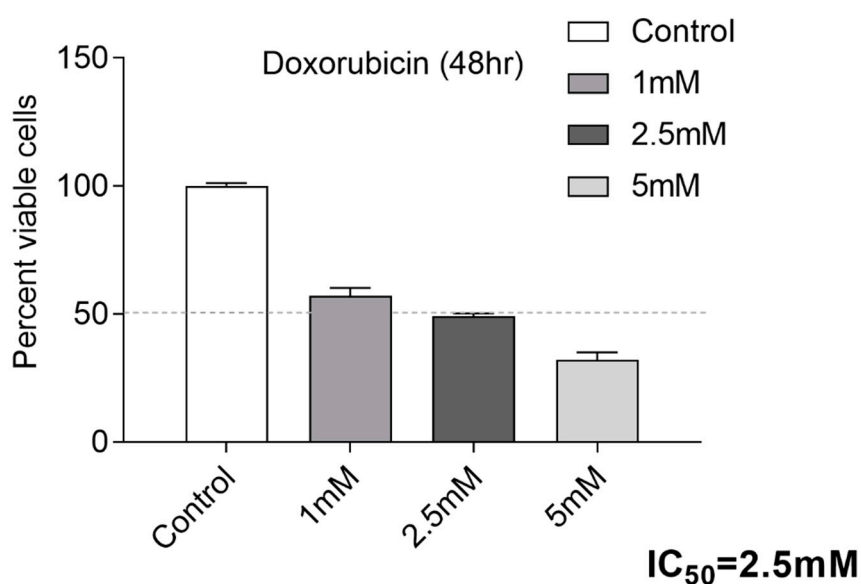

**Figure S4.** Determination of Doxorubicin IC<sub>50</sub> in WERI-Rb1 cells using MTS assay. The dotted horizontal lines represent 50% viability. The concentrations of doxorubicin varied from 1mM to 5mM for 48hour exposure in WERI-Rb1 cells. Doxorubicin IC<sub>50</sub> = 2.5mM for WERI-Rb1 cells.

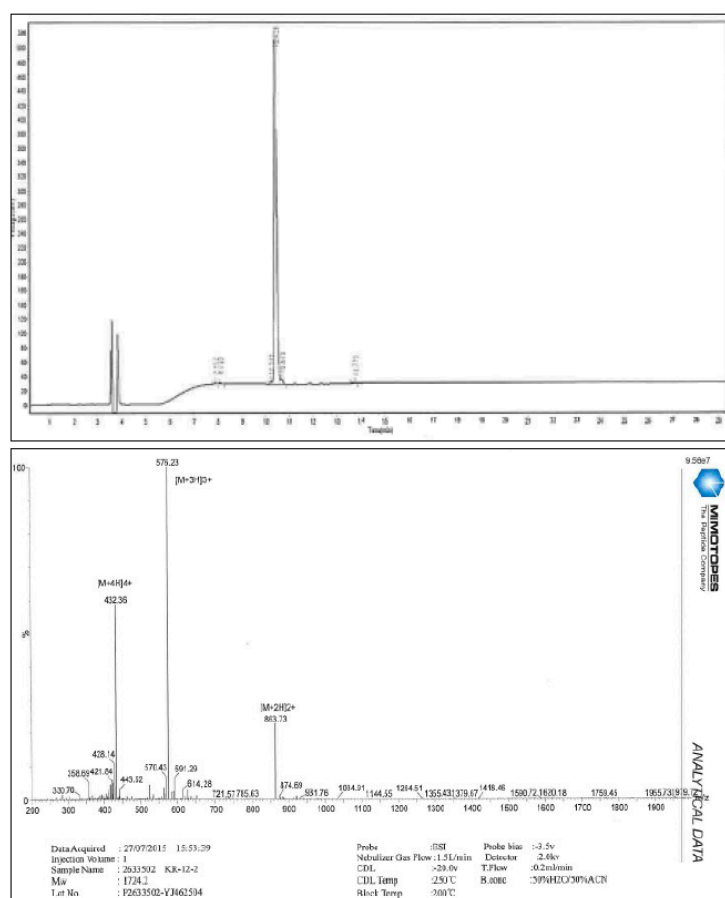

Figure S5. RP-HPLC (top panel) and ESI-MS (bottom panel) of peptide HC1.

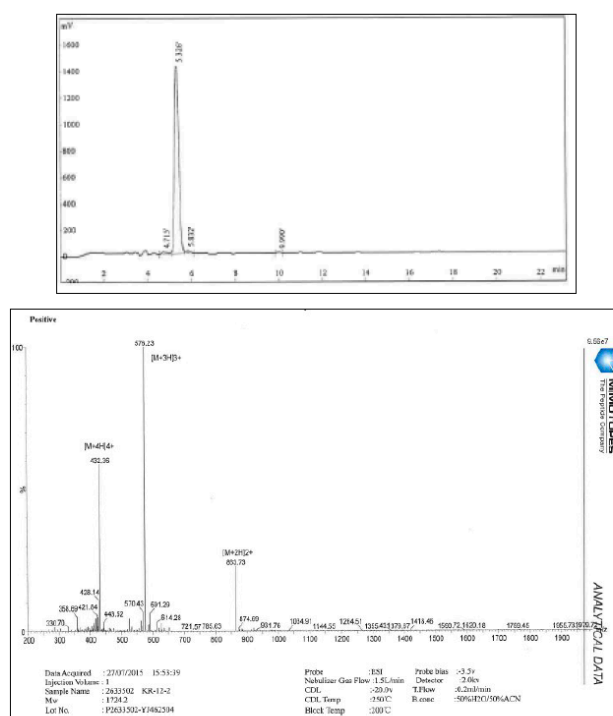

Figure S6. RP-HPLC (top panel) and ESI-MS (bottom panel) of peptide HC2.

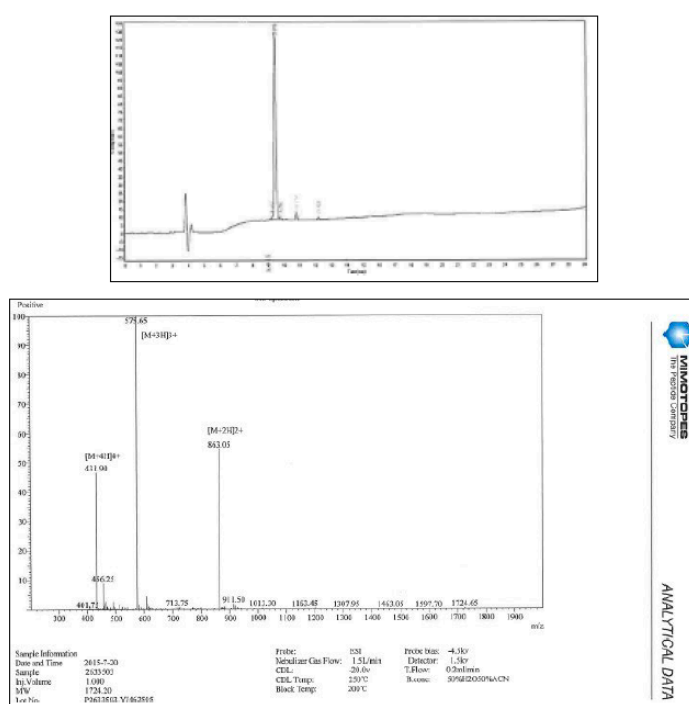

Figure S7. RP-HPLC (top panel) and ESI-MS (bottom panel) of peptide HC3.

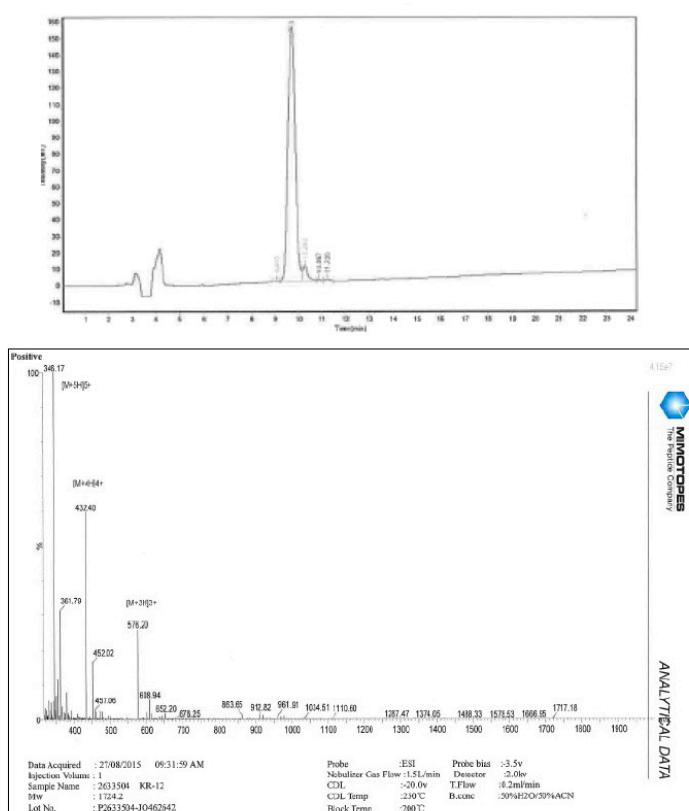

Figure S8. RP-HPLC (top panel) and ESI-MS (bottom panel) of peptide HC4.

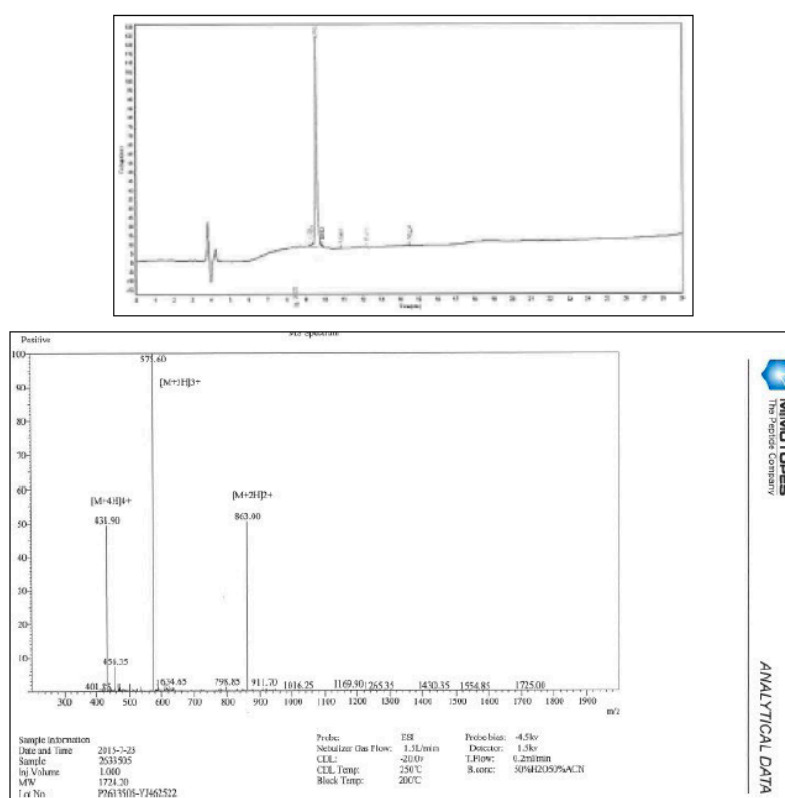

**Figure S9.** RP-HPLC (top panel) and ESI-MS (bottom panel) of peptide HC5.

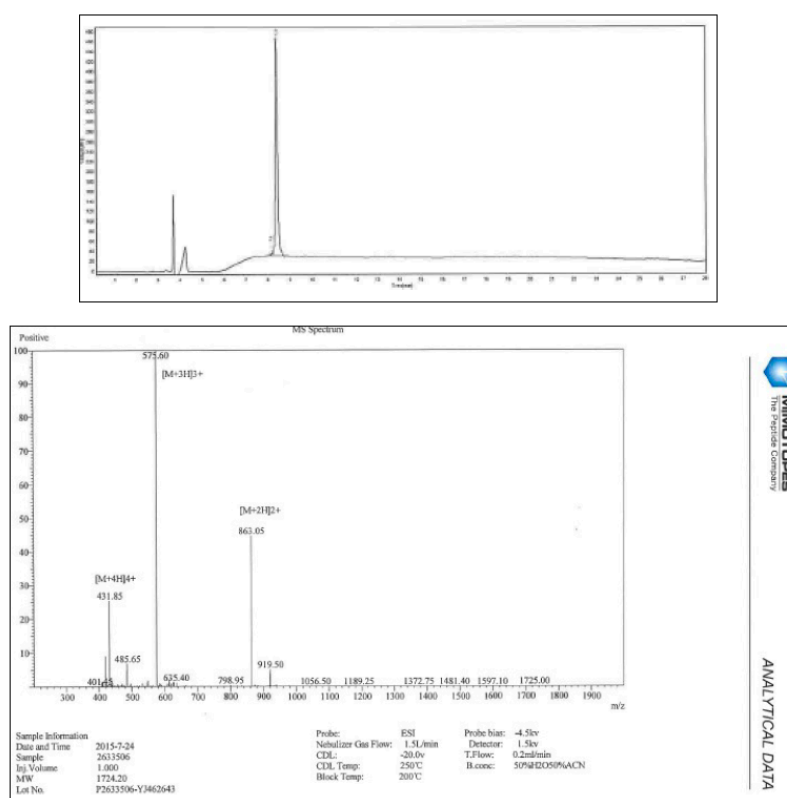

**Figure S10.** RP-HPLC (top panel) and ESI-MS (bottom panel) of peptide HC6.

**Table S1.** Antimicrobial properties of the peptides against a panel of *P. aeruginosa* and *S. aureus*/MRSA Strains.

[illegible]
